# Supplementary material
Source: PubMed Central journal article supplement (PMC3009928)
Supplement: supp_M110.145904_jbc.M110.145904-1.pdf [file supp_M110.145904_jbc.M110.145904-1.pdf]

## **SUPPLEMENTAL DATA**

### **LEGENDS TO SUPPLEMENTAL FIGURES**

**SUPPLEMENTAL FIGURE S1. Comparison of the amino acid sequences of P4H-TM homologues from zebrafish (z), mouse (m) and human (h) sources.** The black boxes represent identical amino acids. Gaps were introduced for optimal alignment. A dashed line indicates the transmembrane domain and asterisks the conserved catalytically critical amino acids.

**SUPPLEMENTAL FIGURE S2. Comparison of the cerebral structures of P4H-TM deficient and control embryos.** Hematoxylin and eosin stained sections of 4 dpf MM and TM1+p53 larvae are shown. Dc indicates dicephalon and Tc indicates telencephalon.

**SUPPLEMENTAL FIGURE S3. P4H-TM deficient larvae develop no signs of polycythemia or anemia.** *O*-dianisidine stainings of 2 dpf RC, MM, TM1 and TM3 embryos. Intensity of staining was scored 1-3.

Supplemental Figure S1.

```

zP4H-TM 1 MLSGKMMEPQ DDIEEDDSPSASAPPSSSPSSSPPPRALPRQRTSLQKS SVCSRSYFMVVMVFFEVYIINVIALL
mP4H-TM 1 MAAAVAVVORPEAETVEEASNLQWPLPPSHRPSCAATRPGDSEDAPVRPLCKPRGICSRAYFLVLMVFVHLYLGNVLALL
hP4H-TM 1 MAAAVAVCORPETAAAEASRPQW-APPDHCQAQAAGLGDGEDAPVRPLCKPRGICSRAYFLVLMVFVHLYLGNVLALL
-----
zP4H-TM 77 LVVHYNNGSNAISANRDFTSSSDSSSHKVTGASDAQATADSGFPRNMFLPRIEGTRVGHVQKVSLVSGKVHEMKTLSLKPL
mP4H-TM 81 LFVHYSNGD ESTDPGPORREQSPQFVPTLGP LTRLEGIKVGMERKVQVVAGRDHFIRTLSLKPL
hP4H-TM 80 LFVHYSNGD ESSDPGPORRVQGPCPEPTLGP LTRLEGIKVGMERKVQLVTDRDHFIRTLSLKPL
---
zP4H-TM 157 LFELPDLFSEEECAVVVRLAQLKLMESQVMVPEGOEELDQQLNLSPEEIFNFLDLNODCOLOPHEILTHSRVRDGIWLT
mP4H-TM 145 LFELPGFLSDEECRLIIHLAQMKLQRSQILPTEEEYEEAMSAMQVSQLDLFOLLDONHDGRLQLREVLAQTRLGNGRWMT
hP4H-TM 144 LFELPGFLTDEECRLIIHLAQMKLQRSQILPTEEEYEEAMSTMQVSQLDLFRLLDONRDGHLQLREVLAQTRLGNGWMT
---
zP4H-TM 237 SENLKEIYDGLKADLDCNGLLSLEEFGRLRSDAFORFLLQRGVERSQLVRNSRHTWLYQQGAHQVLQDLRKSLSRVITL
mP4H-TM 225 PENIQEMYSAIKADPDGDGVLSLQEFSNMDLRDFHKYMRSHKAESNELVRNSHHTWLHQEGGAHVMRATRQ RVLRL
hP4H-TM 224 PESIQEMYAAIKADPDGDGVLSLQEFSNMDLRDFHKYMRSHKAESSELVRNSHHTWLYQEGGAHHMRATRQ RVLRL
---
zP4H-TM 317 TRLPSSLVELSEPLQVVRYEGGGHYHAHHDSGPVYPETACHTHRLAANTTSPFOTSCRYMTVLFYLNNVTGGETVFPVA
mP4H-TM 302 TRLSPEIVFSEPLQVVRYEGGGHYHAHVDSGPVYPETICSHTKLVANESVPFETSCRYMTVLFYLNNVTGGETVFPVA
hP4H-TM 301 TRLSPEIVELSEPLQVVRYEGGGHYHAHVDSGPVYPETICSHTKLVANESVPFETSCRYMTVLFYLNNVTGGETVFPVA
---
zP4H-TM 397 DNRTYEASLIQNDVLDLDRTRRHCDKGNLRVKPQGTAVFWYNYLSDGRGWVGEQDEYSLHGGCVVTQGTKWVANNWINV
mP4H-TM 382 DNRTYDEMSLIQDDVLDLDRTRRHCDKGNLRVKPQGTAVFWYNYLSDGRGWVGEVDDYSLHGGCLVTRGTKWVANNWINV
hP4H-TM 381 DNRTYDEMSLIQDDVLDLDRTRRHCDKGNLRVKPQGTAVFWYNYLSDGRGWVGEVDDYSLHGGCLVTRGTKWVANNWINV
---
zP4H-TM 477 DPDYQRQARYQ 487
mP4H-TM 462 DPSRARQALFQQEMARLAREGGMDSQPEWALDRAYSDARVEL 503
hP4H-TM 461 DPSRARQALFQQEMARLAREGGTDSQPEWALDRAYRDARVEL 502

```

Supplemental Fig. S2

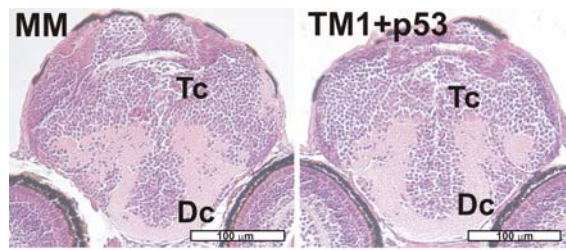

Supplemental Fig. S3

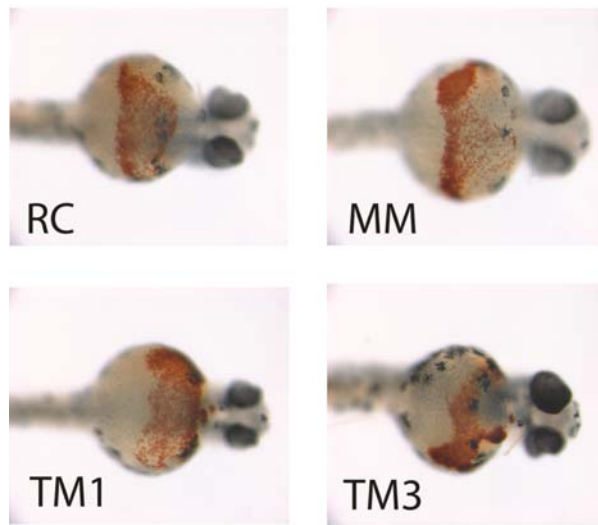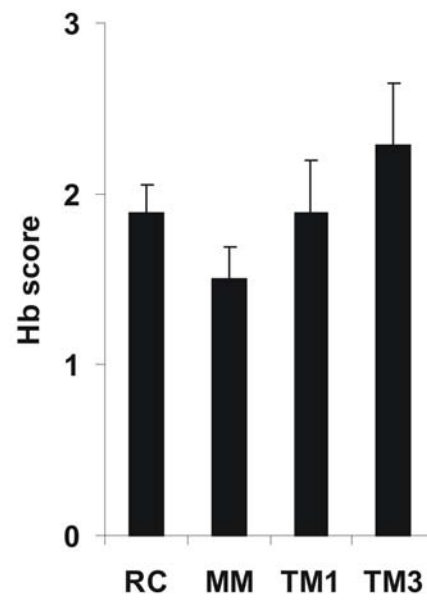

### **SUPPLEMENTAL MOVIES**

**Movie S1.** Time-lapse movie of the heart of a 2 dpf RC embryo.

**Movie S2.** Time-lapse movie of the heart of a 2 dpf MM embryo.

**Movie S3.** Time-lapse movie of the heart of a 2 dpf TM1 embryo.

**Movie S4.** Time-lapse movie of the heart of a 2 dpf TM3 embryo.

SUPPLEMENTAL TABLE S1. **Primers used in the study.**

Sequences of Primers Used in Q-PCR

| Gene                  | Forward Primer        | Reverse Primer         |
|-----------------------|-----------------------|------------------------|
| P4H-TM                | TACGGGTGGGCCATG       | CAGCAGAGGCTTTAGACTGAG  |
| Hif-1 $\alpha$        | GCGTAAGAGGAAGCTGAACG  | TCCACACTGTGAAGCAAAGC   |
| Hif-2 $\alpha$        | TCAGTTGCACCGACTGTCTC  | TGCACTACTTGGAGGTGCAG   |
| Hif-p4h-1             | GGGATTGTGTCATCAATG    | GGGATTGTGTCATCAATG     |
| Hif-p4h-2             | GGAGATGGGAGATGTGTCA   | TGAGCTGTTCCCTCTGGA     |
| Hif-p4h-3             | AGTTCAGCCGTCGTATGC    | CTGTGAGATGGCTGTGAGA    |
| Epo                   | CTCTTTGCCTTACTGCTGATG | CATAGCAGCCTCTGCATC     |
| Vegf-a                | TCCTGTGTGGTTCTCATGC   | TGCATTCACACTTGGTGTGTTC |
| Glut-1                | GTGGGTTTGGAAACGGTA    | CTCAGGGCAAAAAGGAAGA    |
| Ldha                  | GGCTATGGACTTGCAGCA    | CTTTTGAGTTTGCGGTAC     |
| C-P4H- $\alpha$ (I)   | GGCGAATTATGGTGTGGAG   | GTTGCTATGCGATTCCCTGT   |
| Lox                   | GGAGGACACGTCCTGTGACT  | TTGGCAGTCAATGTCAGCAT   |
| Col(IV) $\alpha$ 3    | CAATTGTTTGCCGATGTTCA  | GAGGCGTAGCGACAAGTTTC   |
| Col(XVIII) $\alpha$ 1 | CGGGACGGTGTAGACAAG    | GGTGGAGAAATCTGCTCTG    |
