# Supplementary material
Source: PubMed Central journal article supplement (PMC3009928)

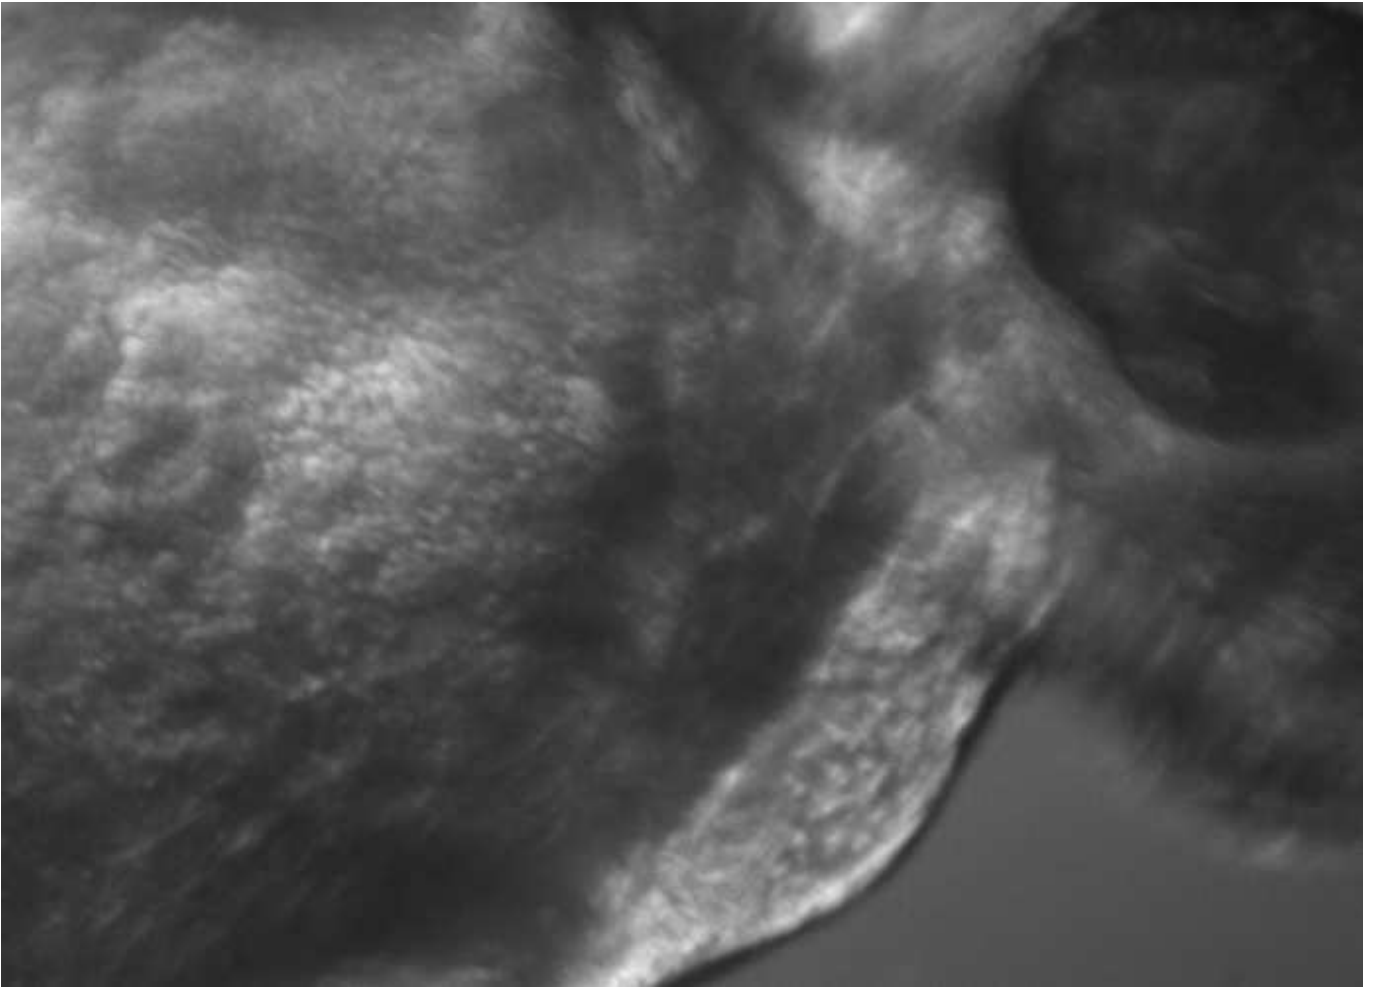

Supplement: supp_M110.145904_jbc.M110.145904-6.pdf [file supp_M110.145904_jbc.M110.145904-6.pdf]

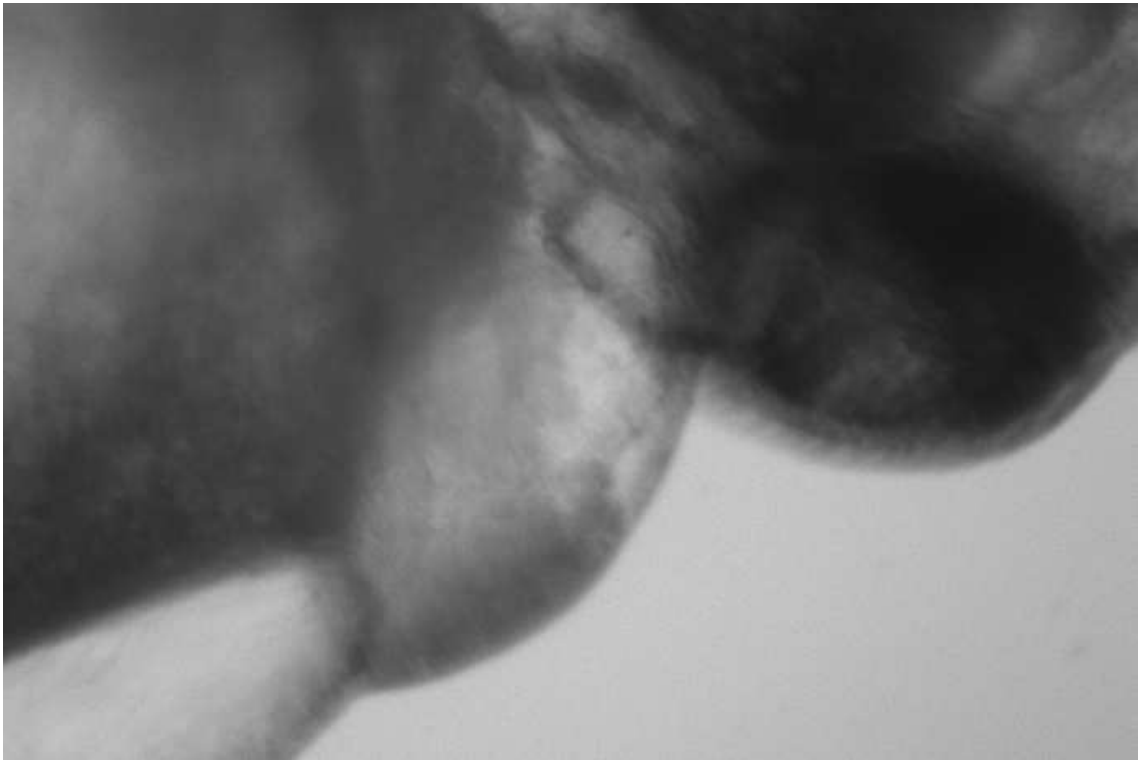

Supplement: supp_M110.145904_jbc.M110.145904-7.pdf [file supp_M110.145904_jbc.M110.145904-7.pdf]

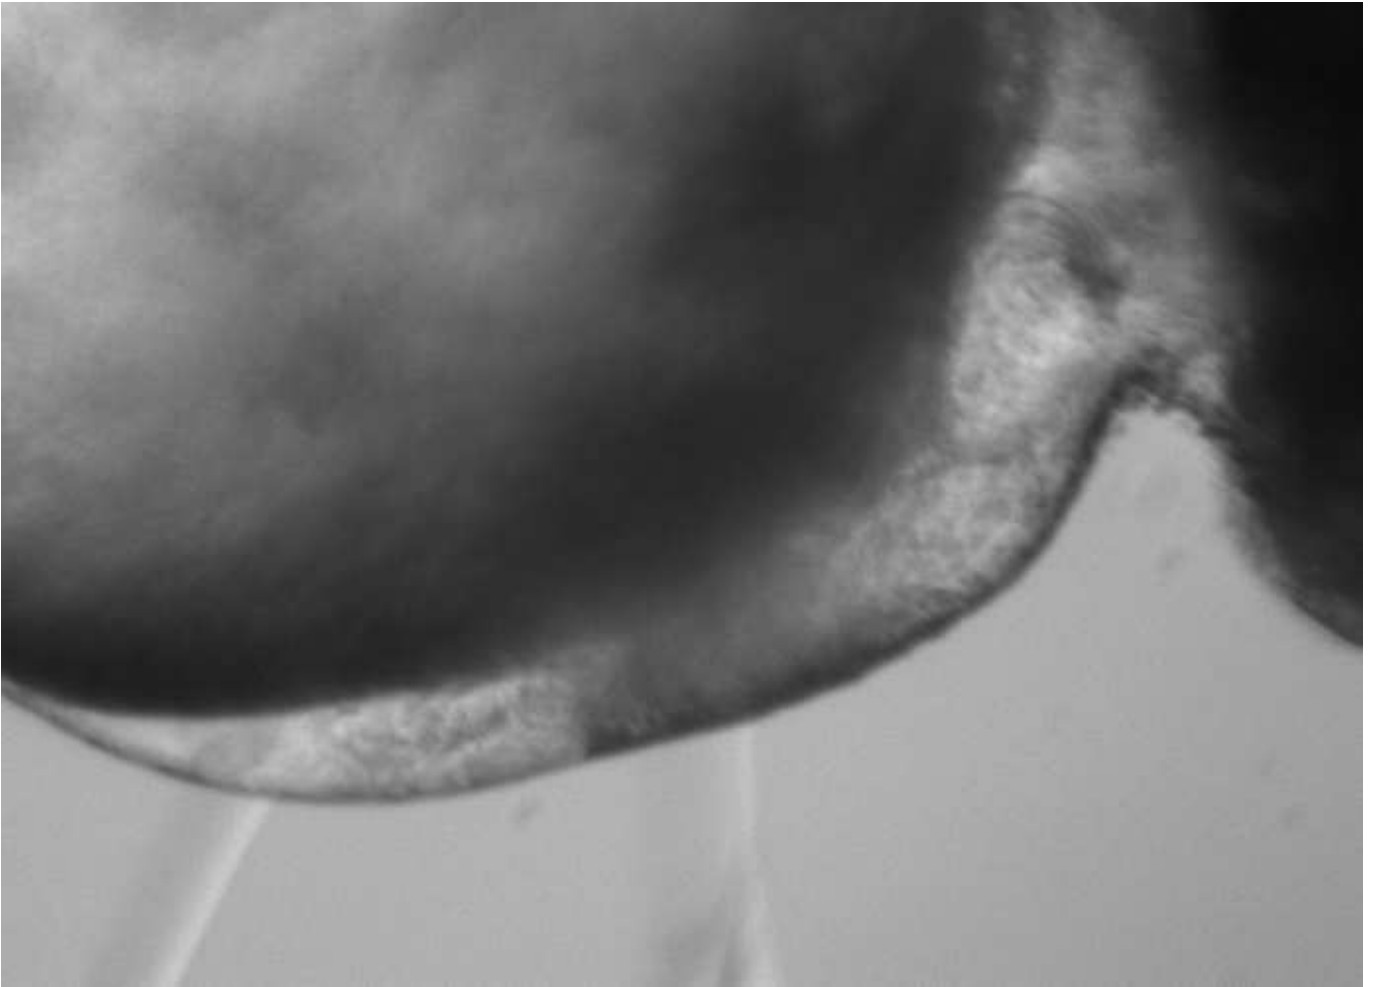

Supplement: supp_M110.145904_jbc.M110.145904-8.pdf [file supp_M110.145904_jbc.M110.145904-8.pdf]

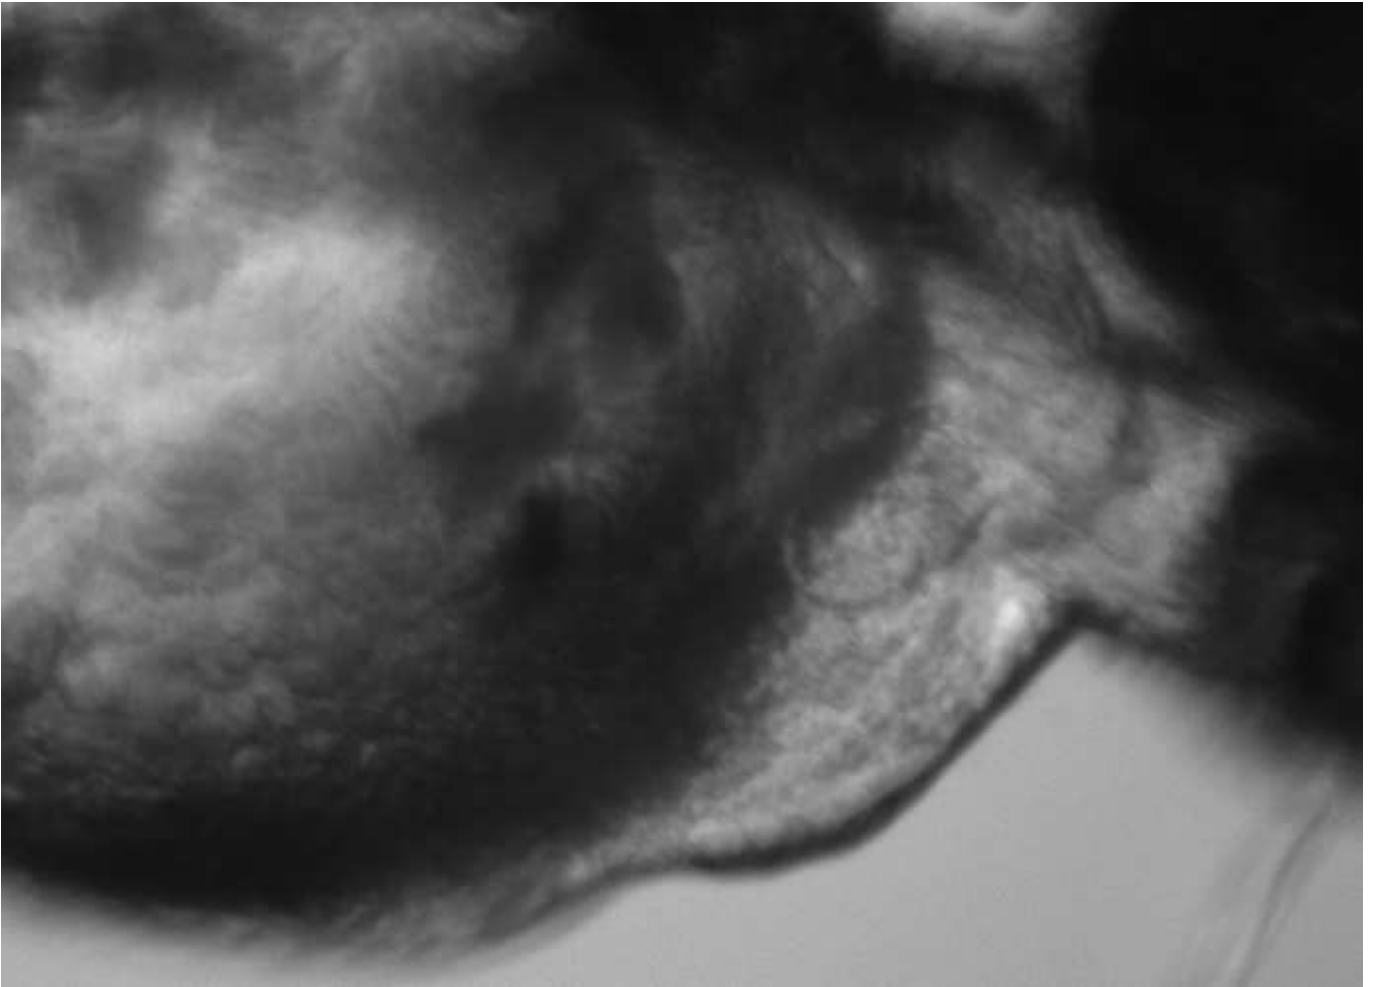

Supplement: supp_M110.145904_jbc.M110.145904-9.pdf [file supp_M110.145904_jbc.M110.145904-9.pdf]
